# Supplementary material
Source: PubMed Central journal article supplement (PMC4543558)
Supplement: NIHMS700924-supplement-Supplemental_Material.pdf [file NIHMS700924-supplement-Supplemental_Material.pdf]

## **SUPPLEMENTAL MATERIAL**

## **Supplemental Figure Legend**

Aortic Aneurysm (AAA) Study Design, ARIC

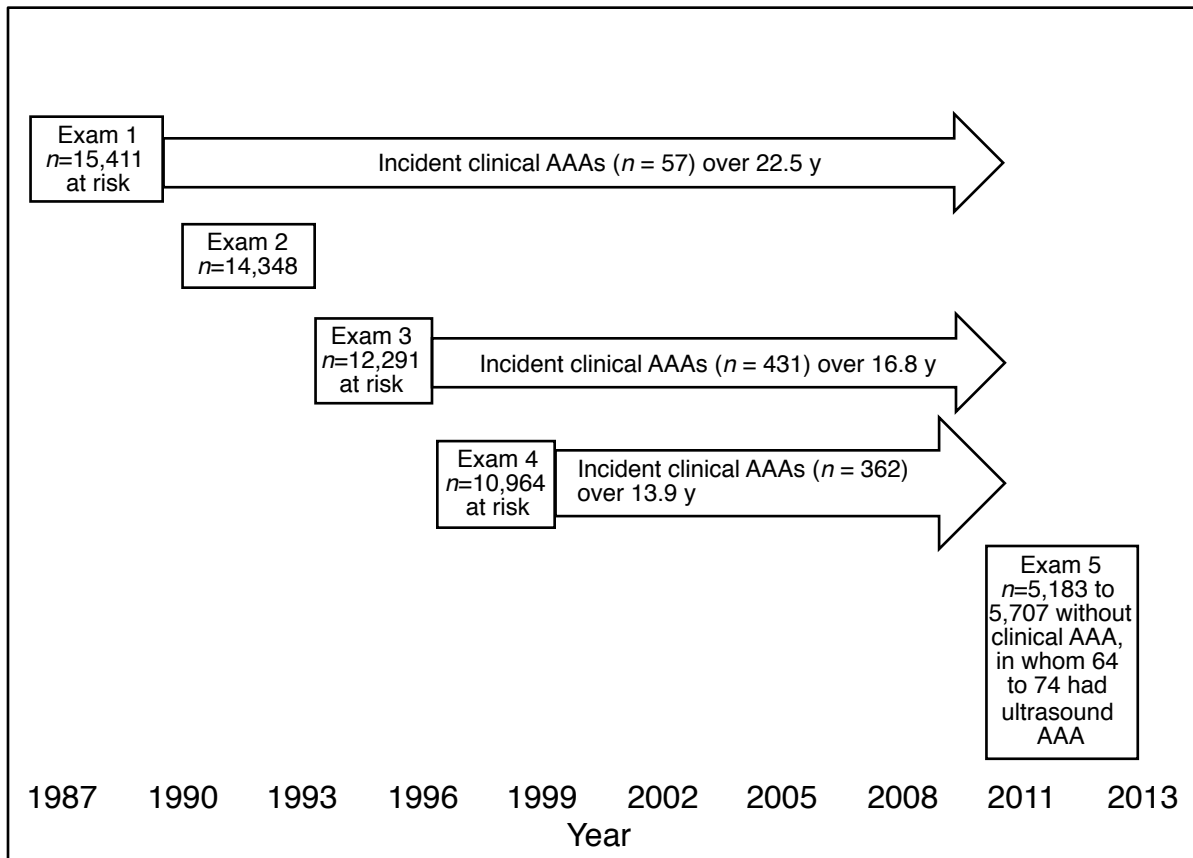

**Supplemental Table 1. Unadjusted Participant Characteristics and Biomarker Levels at ARIC Visits, Overall and by Follow-up AAA Status**

| Characteristic                                     | Overall | Developed AAA |       |
|----------------------------------------------------|---------|---------------|-------|
|                                                    |         | Yes           | No    |
| <u>Baseline characteristics*</u>                   |         |               |       |
| Mean age, year                                     | 54.2    | 56.7          | 54.0  |
| Male, %                                            | 44.8    | 71.6          | 43.8  |
| White, %                                           | 73.7    | 86.0          | 73.3  |
| Mean height, cm                                    | 168.5   | 172.5         | 168.3 |
| Mean weight, kg                                    | 78.8    | 81.0          | 78.7  |
| Smoking status                                     |         |               |       |
| Current, %                                         | 26.1    | 50.6          | 25.2  |
| Former, %                                          | 32.2    | 37.1          | 32.0  |
| Never, %                                           | 41.6    | 12.1          | 42.8  |
| Diabetes, %                                        | 11.7    | 7.2           | 11.9  |
| Mean systolic blood pressure, mmHg                 | 121.3   | 124.2         | 121.1 |
| Hypertensive medication use, %                     | 25.2    | 30.5          | 25.0  |
| Mean total cholesterol, mg/dL                      | 214.6   | 222.3         | 214.3 |
| Mean HDL, mg/dL                                    | 51.6    | 44.2          | 51.9  |
| Lipid-lowering medication use, %                   | 2.9     | 4.3           | 2.8   |
| <u>Baseline biomarkers (medians)*</u>              |         |               |       |
| White blood cell count, 1000 cells/mm <sup>3</sup> | 5.8     | 6.6           | 5.8§  |
| Fibrinogen, mg/dL                                  | 295     | 316           | 294§  |
| Factor VII, %                                      | 116     | 116           | 116   |
| Factor VIII, %                                     | 126     | 127           | 126   |
| von Willebrand factor, %                           | 110     | 113           | 109   |
| Protein C, $\mu$ g/mL                              | 3.1     | 3.0           | 3.1§  |
| Antithrombin III, %                                | 109     | 109           | 109   |
| aPTT, sec                                          | 28.8    | 29.1          | 28.8§ |
| <u>Visit 3 biomarkers (medians)†</u>               |         |               |       |
| D-dimer, $\mu$ g/mL                                | 0.27    | 0.38          | 0.27§ |
| <u>Visit 4 biomarkers (medians)‡</u>               |         |               |       |
| Troponin T, ng/L                                   | 5       | 7             | 3§    |
| NT-proBNP, pg/mL                                   | 67.2    | 95.1          | 66.6§ |
| C-reactive protein, mg/L                           | 2.44    | 2.88          | 2.42§ |

\* At baseline, overall N = 15,411 and 587 developed AAA over median of 22.5 years follow-up. Statistical testing was performed only for biomarkers and not other baseline characteristics.

† At Visit 3, overall N = 12,271 and 431 developed AAA over median of 16.8 years follow-up.

‡ At visit 4, overall N = 10,964 and 362 developed AAA over median of 13.9 years of follow-up.

§ p<0.01 for difference in biomarker medians by Wilcoxon test between those who did or did not develop AAA.

**Supplemental Table 2. Incidence Rates (95% CIs) and Adjusted Hazard Ratios (HRs) (95% CIs) of Abdominal Aortic Aneurysm From 1987-89 Through 2011 in Relation to Quartiles of Hemostatic Factors in 1987-89, ARIC**

| Biomarker                 |                  | Quartile 1        | Quartile 2        | Quartile 3        | Quartile 4        | P for linear trend |
|---------------------------|------------------|-------------------|-------------------|-------------------|-------------------|--------------------|
| Factor VIII (%)           | Quartile Range   | ≤ 105             | 106 - 126         | 127 - 150         | ≥ 151             |                    |
|                           | N at risk        | 3924              | 3788              | 3744              | 3883              |                    |
|                           | No. events       | 148               | 142               | 160               | 134               |                    |
|                           | Incidence rate*† | 1.82 (1.55, 2.13) | 1.85 (1.57, 2.18) | 2.16 (1.85, 2.52) | 1.87 (1.58, 2.21) |                    |
|                           | Model 1 HR†      | 1                 | 0.98 (0.78, 1.23) | 1.19 (0.95, 1.49) | 1.13 (0.89, 1.43) | 0.34               |
|                           | Model 2 HR‡      | 1                 | 0.98 (0.78, 1.24) | 1.20 (0.95, 1.51) | 1.11 (0.87, 1.42) | 0.40               |
| von Willebrand factor (%) | Quartile Range   | ≤ 83              | 84 - 109          | 110 - 142         | ≥ 143             |                    |
|                           | N at risk        | 3804              | 3859              | 3838              | 3846              |                    |
|                           | No. events       | 131               | 139               | 167               | 148               |                    |
|                           | Incidence rate*† | 1.65 (1.39, 1.96) | 1.78 (1.51, 2.11) | 2.20 (1.89, 2.56) | 2.08 (1.77, 2.45) |                    |
|                           | Model 1 HR†      | 1                 | 0.98 (0.77, 1.24) | 1.17 (0.93, 1.47) | 1.14 (0.90, 1.45) | 0.28               |
|                           | Model 2 HR‡      | 1                 | 1.02 (0.80, 1.30) | 1.21 (0.96, 1.53) | 1.14 (0.89, 1.46) | 0.29               |
| Factor VII (%)            | Quartile Range   | ≤ 99              | 100 - 115         | 116 - 135         | ≥ 136             |                    |
|                           | N at risk        | 3768              | 3654              | 3893              | 3727              |                    |
|                           | No. events       | 153               | 130               | 154               | 132               |                    |
|                           | Incidence rate*† | 2.07 (1.77, 2.42) | 1.78 (1.50, 2.11) | 1.98 (1.69, 2.32) | 1.80 (1.52, 2.14) |                    |
|                           | Model 1 HR†      | 1                 | 0.91 (0.72, 1.15) | 1.09 (0.87, 1.37) | 1.15 (0.90, 1.46) | 0.26               |
|                           | Model 2 HR‡      | 1                 | 0.88 (0.69, 1.12) | 0.99 (0.79, 1.26) | 0.98 (0.76, 1.27) | 0.89               |
| Protein C (µg/mL)         | Quartile Range   | ≤ 2.7             | 2.8 - 3.1         | 3.2 - 3.5         | ≥ 3.6             |                    |
|                           | N at risk        | 3853              | 4206              | 3526              | 3760              |                    |
|                           | No. events       | 171               | 164               | 125               | 124               |                    |
|                           | Incidence rate*† | 2.28 (1.96, 2.65) | 1.97 (1.69, 2.29) | 1.77 (1.49, 2.11) | 1.65 (1.38, 1.97) |                    |
|                           | Model 1 HR†      | 1                 | 0.90 (0.73, 1.12) | 0.85 (0.67, 1.07) | 0.89 (0.70, 1.12) | 0.32               |
|                           | Model 2 HR‡      | 1                 | 0.87 (0.70, 1.09) | 0.73 (0.57, 0.94) | 0.75 (0.58, 0.97) | 0.03               |
| Antithrombin III (%)      | Quartile Range   | ≤ 96              | 97 - 109          | 110 - 123         | ≥ 124             |                    |
|                           | N at risk        | 3846              | 3852              | 3763              | 3881              |                    |
|                           | No. events       | 149               | 149               | 129               | 158               |                    |
|                           | Incidence rate*† | 1.93 (1.65, 2.27) | 1.94 (1.65, 2.28) | 1.71 (1.44, 2.03) | 2.12 (1.81, 2.47) |                    |
|                           | Model 1 HR†      | 1                 | 1.10 (0.87, 1.38) | 1.01 (0.80, 1.28) | 1.44 (1.15, 1.80) | 0.002              |
|                           | Model 2 HR‡      | 1                 | 1.03 (0.81, 1.29) | 0.98 (0.77, 1.24) | 1.29 (1.03, 1.63) | 0.03               |

| aPTT (sec) | Quartile Range   | ≤ 27.0            | 27.1 - 28.7       | 28.8 - 30.7       | ≥ 30.8            |      |
|------------|------------------|-------------------|-------------------|-------------------|-------------------|------|
|            | N at risk        | 3804              | 3785              | 3877              | 3869              |      |
|            | No. events       | 112               | 155               | 149               | 168               |      |
|            | Incidence rate*† | 1.51 (1.26, 1.82) | 2.06 (1.76, 2.41) | 1.92 (1.64, 2.25) | 2.18 (1.87, 2.54) |      |
|            | Model 1 HR†      | 1                 | 1.32 (1.04, 1.69) | 1.22 (0.95, 1.56) | 1.34 (1.06, 1.71) | 0.02 |
|            | Model 2 HR‡      | 1                 | 1.34(1.04, 1.72)  | 1.23 (0.95, 1.58) | 1.24 (0.97, 1.59) | 0.09 |

\* Incidence rate per 1000 person-years.

† Adjusted for age, sex, and race.

‡ Adjusted for age, sex, race-center, height, weight, smoking pack years, diabetes, systolic blood pressure, blood pressure medications, total cholesterol, high-density lipoprotein cholesterol, and lipid medications.

Due to missing data, counts of participants and AAA events shown are somewhat less than the maximum of 587 AAA events among 15,411 at risk, and are for Model 1. These vary slightly among biomarkers and were approximately 4% fewer in Model 2.
